# Supplementary material
Source: MDPI journal article supplement (https://www.mdpi.com/2304-6740/5/2/21)
Supplement: s1 [file s1]

# **Supplementary Materials: Photophysics of BODIPY Dyes as Readily Designable Photosensitisers in Light-Driven Proton Reduction**

**Laura Dura, Maria Wächtler, Stephan Kupfer, Joachim Kübel, Johannes Ahrens, Sebastian Höfler,  
Martin Bröring, Benjamin Dietzek, Torsten Beweries**

|     |                                                    |
|-----|----------------------------------------------------|
| S2  | Volumetric curves (as measured) and Hg experiments |
| S3  | Stationary emission spectra                        |
| S5  | Stern Volmer experiments                           |
| S8  | Transient absorption spectra                       |
| S11 | Quantum chemical calculations                      |
| S21 | Analysis of transient absorption data              |
| S23 | ESI-MS data                                        |

## Volumetric Curves

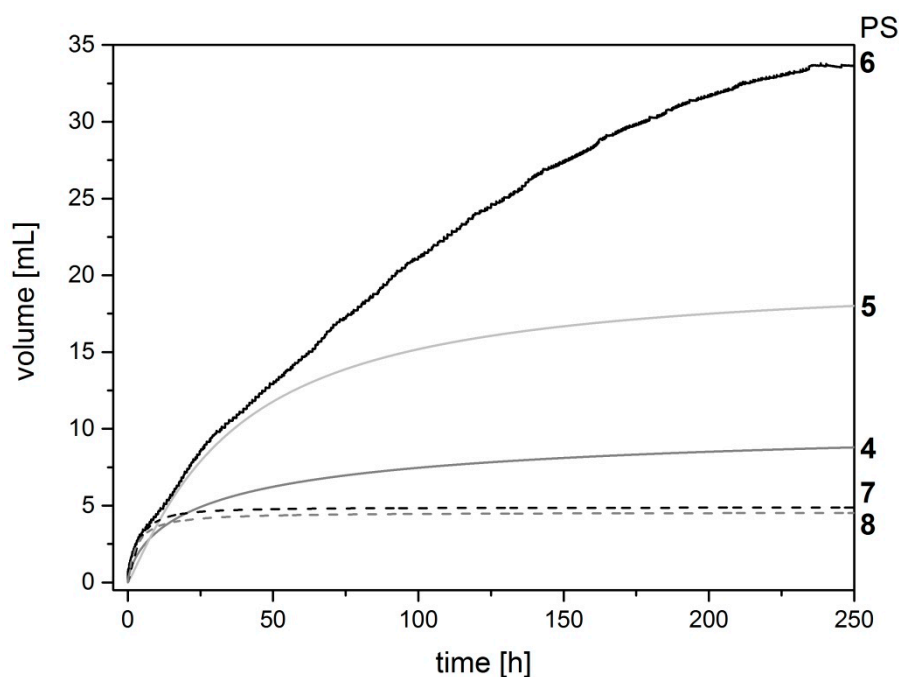

**Figure S1.** Volumetric curves (original data) as measured using multicomponent catalyst systems sensitized by 4–8 containing 10 mL of a 1 mM solution of the PS in THF, 1 mL of a 1 mM solution of  $[\text{PdCl}_2(\text{PPh}_3)]_2$  in THF, 3 mL water, and 8 mL TEA.

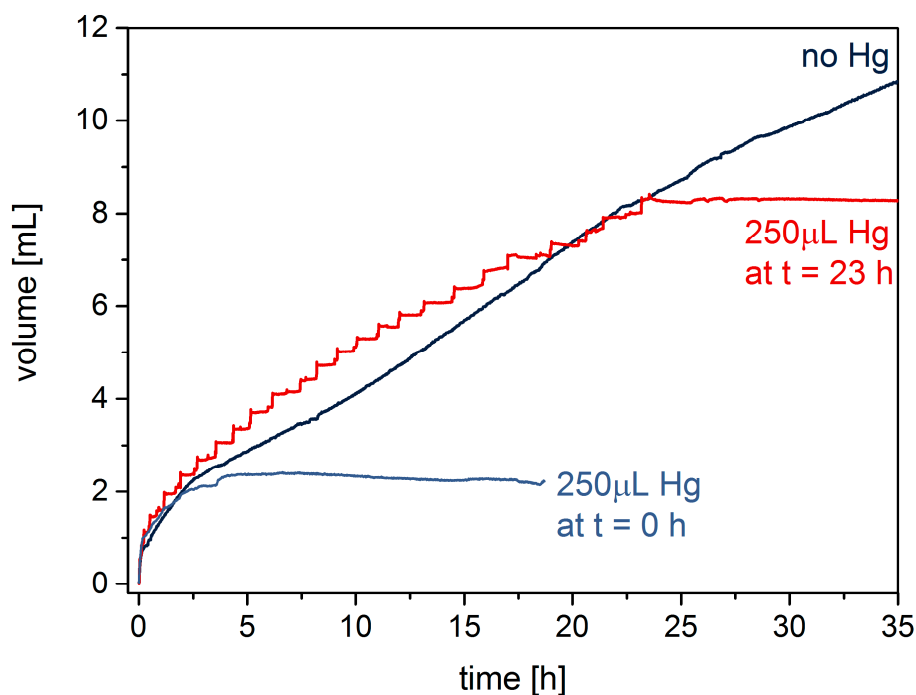

**Figure S2.** Comparison of volumetric curves (original data) as measured using multicomponent catalyst systems containing 10 mL of a 1 mM solution of in THF, 1 mL of a 1 mM solution of  $[\text{PdCl}_2(\text{PPh}_3)]_2$  in THF, 3 mL water, 8 mL TEA, and 250  $\mu\text{L}$  Hg.

## Stationary Emission Spectra

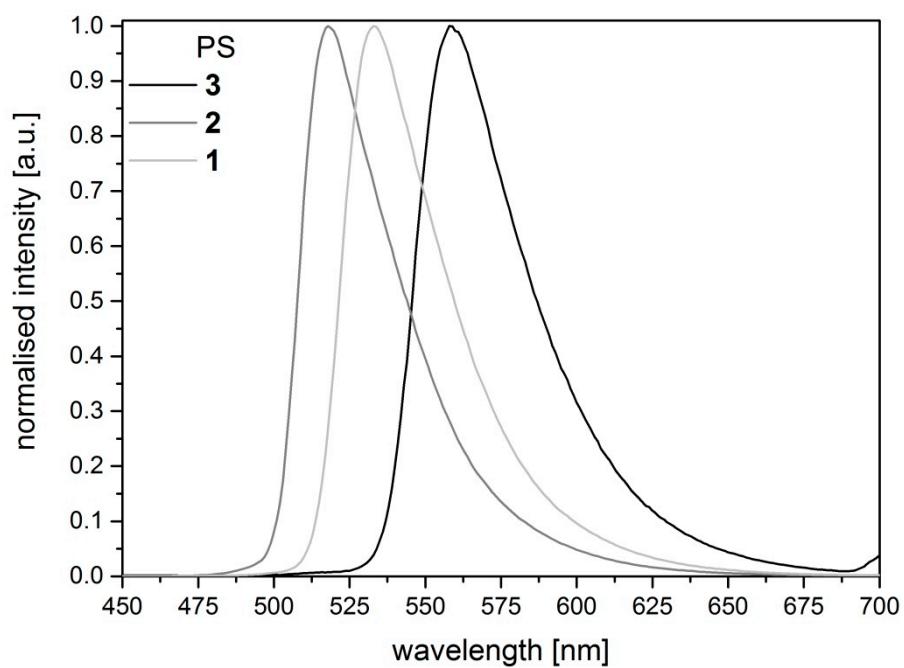

**Figure S3.** Normalised emission spectra of pure BODIPY dyes 1–3 measured in THF,  $c = 5 \times 10^{-5}$  M,  $\lambda_{exc} = 350$  nm.

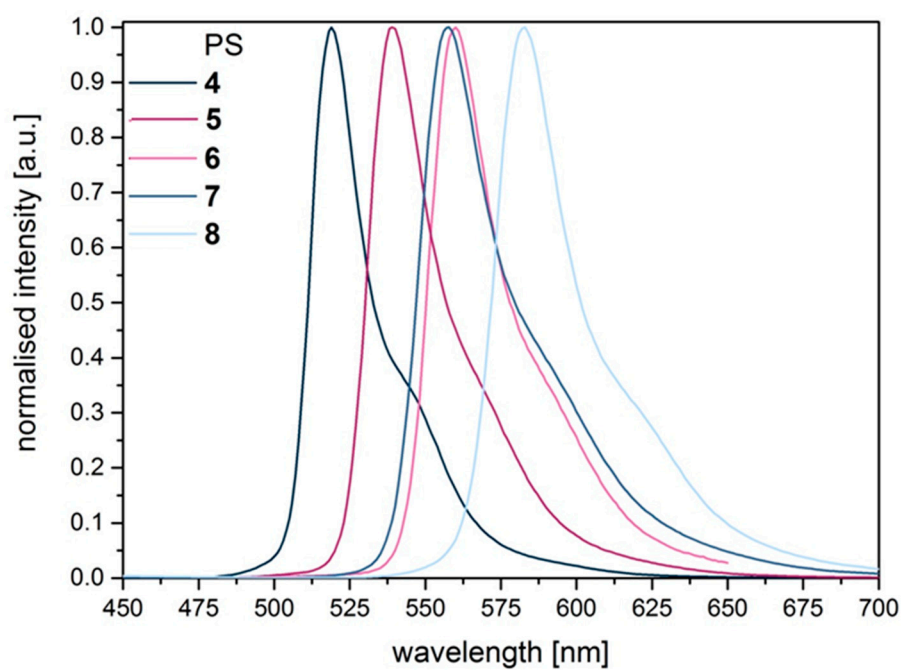

**Figure S4.** Normalised emission spectra of pure BODIPY dyes 4–8 measured in THF,  $c = 5 \times 10^{-5}$  M,  $\lambda_{exc} = 350$  nm.

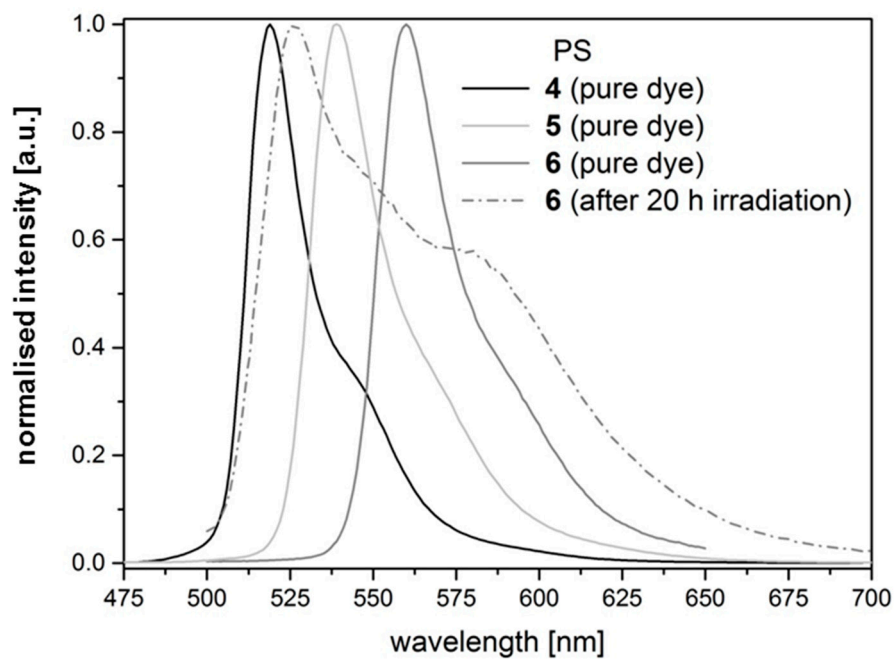

**Figure S5.** Emission spectra of pure BODIPY dyes **4–6** and a **6**-sensitized multicomponent catalyst system after 20 h of irradiation measured in THF,  $c = 5 \times 10^{-5}$  M,  $\lambda_{exc} = 350$  nm.

## Stern-Volmer Experiments

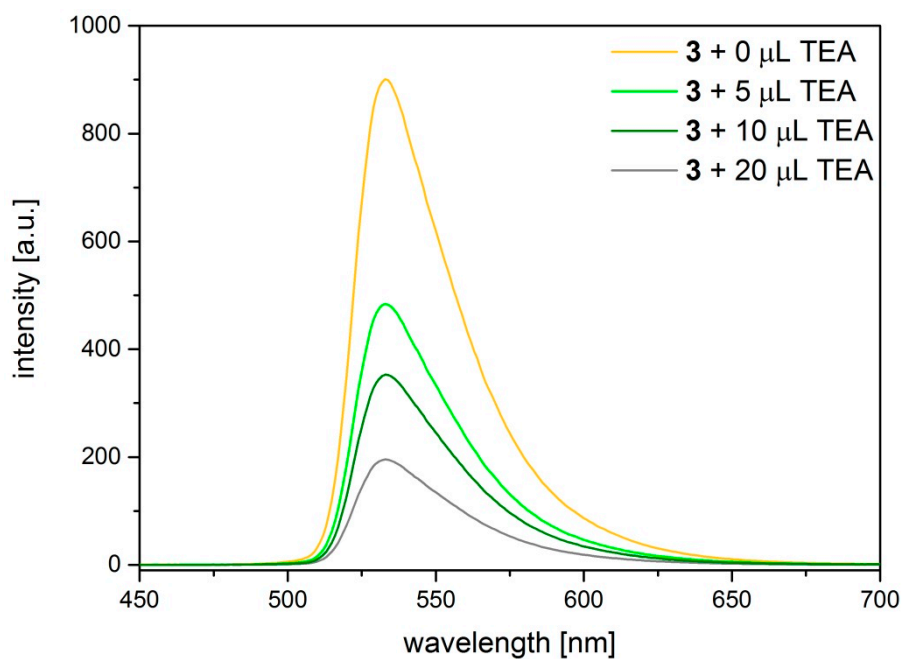

**Figure S6.** Example for stationary Stern-Volmer experiments with *meso*-methyl substituted BODIPY dyes. Fluorescence quenching with triethylamine (TEA) was observed on a  $5 \times 10^{-5}$  M solution of **3** in THF.

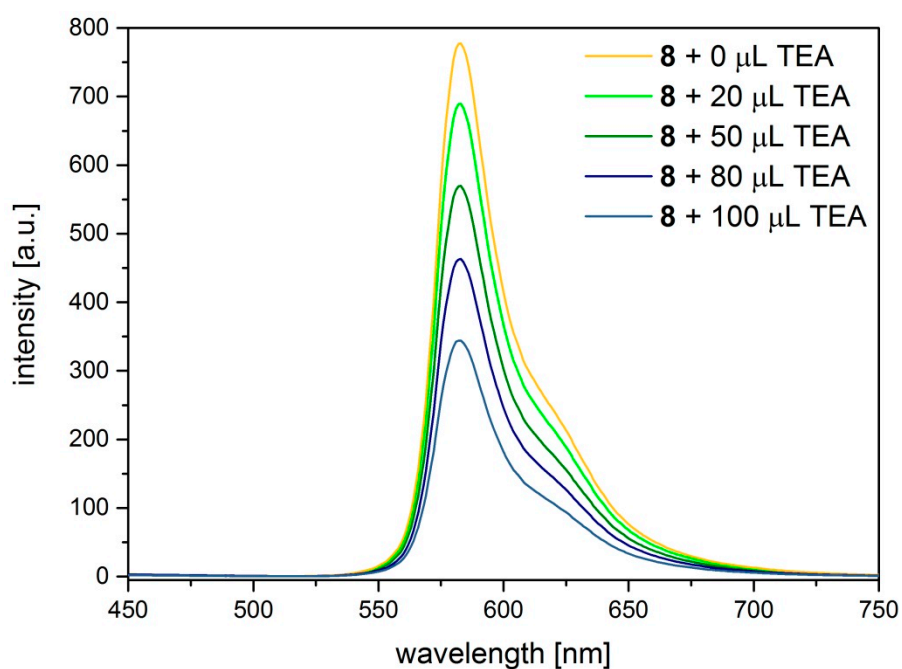

**Figure S7.** Example for stationary Stern-Volmer experiments with *meso*-mesityl substituted BODIPY dyes. Fluorescence quenching with triethylamine (TEA) was observed on a  $5 \times 10^{-5}$  M solution of **8** in THF.

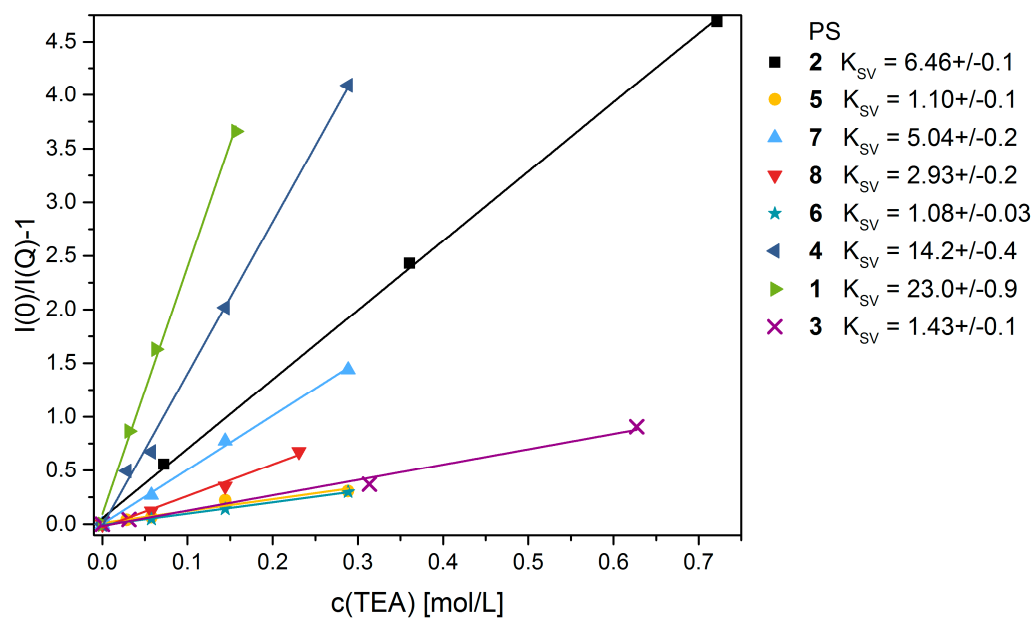

Figure S8. Stern-Volmer plots of fluorescence quenching experiments on BODIPY dyes with TEA.

## Stern–Volmer Kinetics

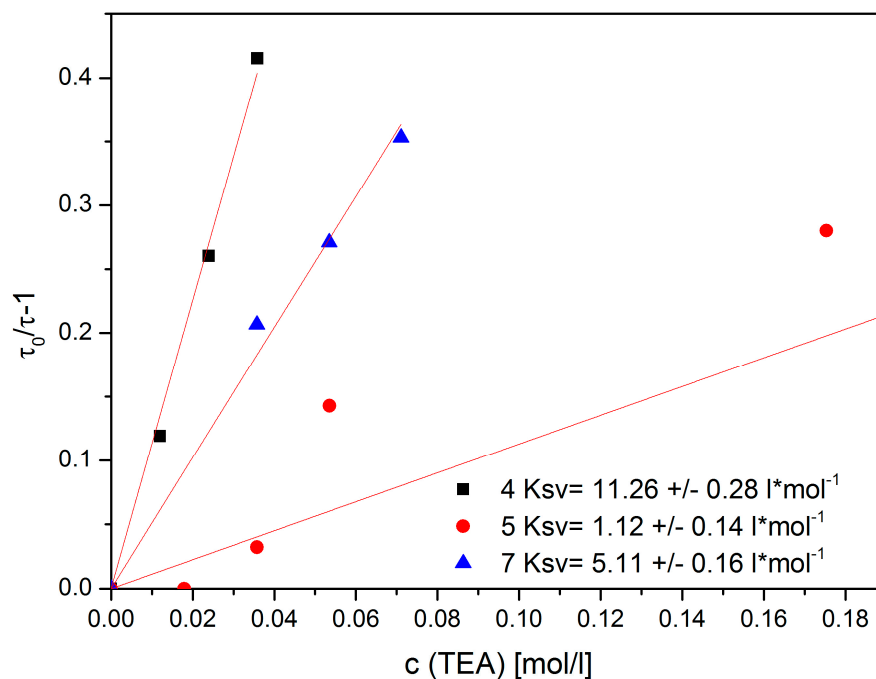

**Figure S9.** Stern–Volmer Plots from emission lifetime quenching with TEA.

**Table S1.** Lifetimes and parameters for the Stern–Volmer Plots.

| 4       |                           |                      | 5       |                           |                      | 7       |                           |                      |
|---------|---------------------------|----------------------|---------|---------------------------|----------------------|---------|---------------------------|----------------------|
| c(TEA)  | $\tau_{em} / \text{ns}^*$ | $\tau_0/\tau_{em}-1$ | c(TEA)  | $\tau_{em} / \text{ns}^*$ | $\tau_0/\tau_{em}-1$ | c(TEA)  | $\tau_{em} / \text{ns}^*$ | $\tau_0/\tau_{em}-1$ |
| 0       | 4.62                      | 0                    | 0       | 0.32                      | 0                    | 0       | 5.02                      | 0                    |
| 0.01198 | 4.11                      | 0.12                 | 0.01793 | 0.32                      | 0                    | 0.03571 | 4.16                      | 0.21                 |
| 0.02393 | 3.65                      | 0.26                 | 0.03577 | 0.31                      | 0.03                 | 0.05344 | 3.95                      | 0.27                 |
| 0.03583 | 3.25                      | 0.42                 | 0.05352 | 0.28                      | 0.14                 | 0.07108 | 3.71                      | 0.35                 |
|         |                           |                      | 0.17536 | 0.25                      | 0.28                 |         |                           |                      |
|         |                           |                      | 0.34239 | 0.24                      | 0.33                 |         |                           |                      |

\*+/- 1%

## ns Time-Resolved Transient Absorption Spectra and Kinetics

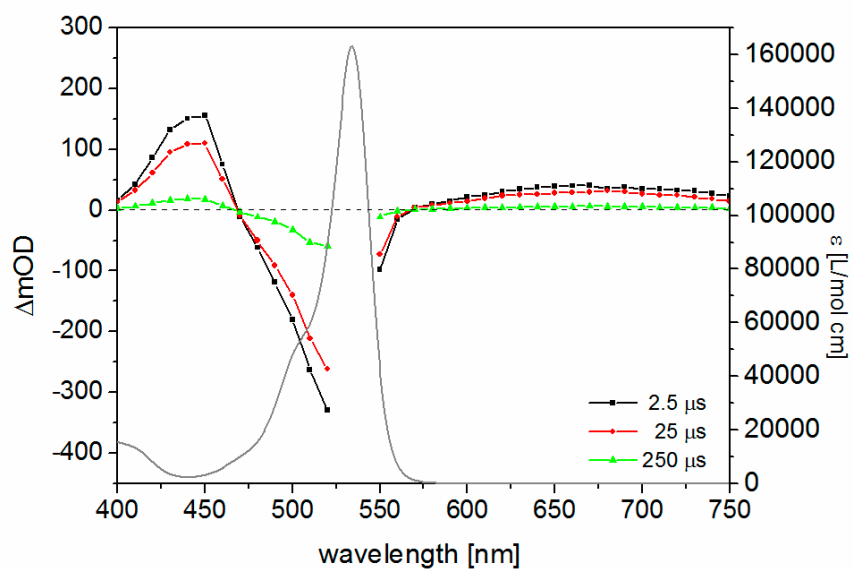

**Figure S10.** Transient absorption spectra at chosen delay times (black, red, green) upon excitation with the pump pulse centred at 535 nm and stationary absorption spectrum (grey) of 6 in THF.

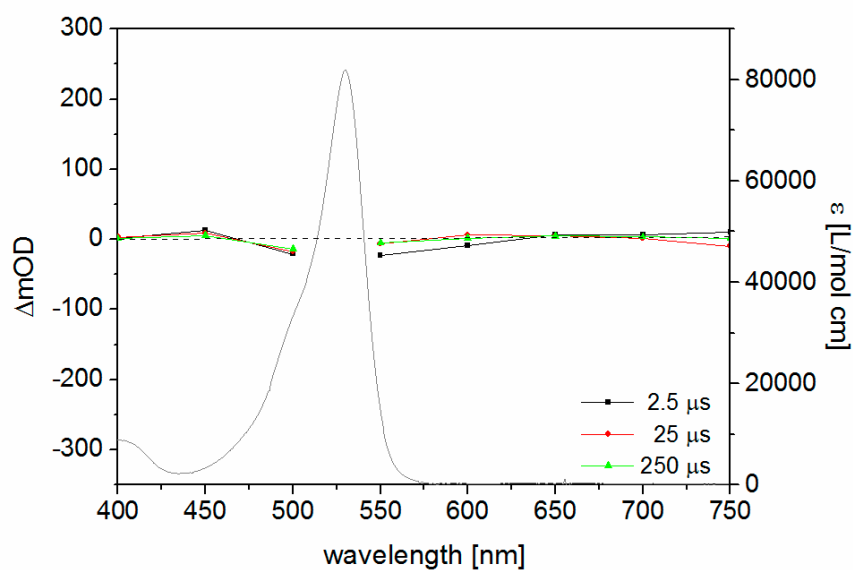

**Figure S11.** Transient absorption spectra at chosen delay times (black, red, green) upon excitation with the pump pulse centred at 530 nm and stationary absorption spectrum (grey) of 7 in THF.



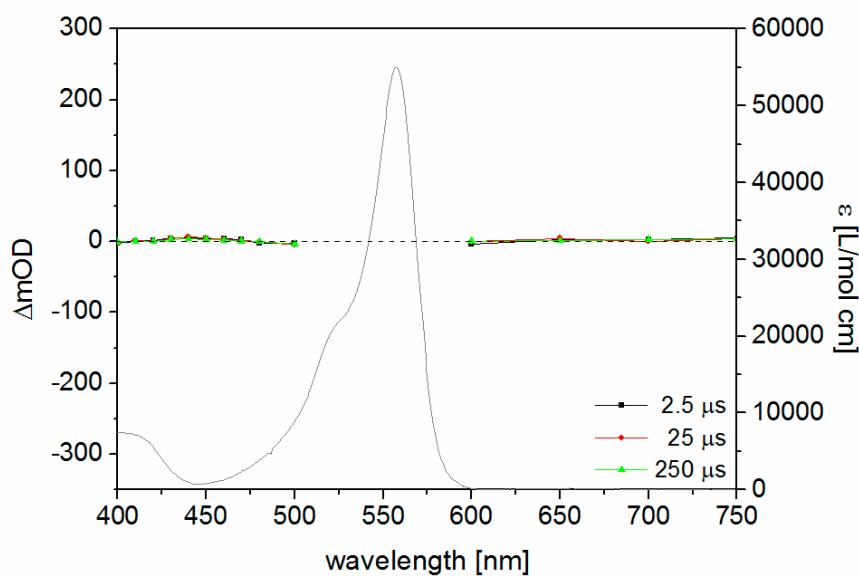

**Figure S12.** Transient absorption spectra at chosen delay times (black, red, green) upon excitation with the pump pulse centred at 560 nm and stationary absorption spectrum (grey) of **8** in THF.

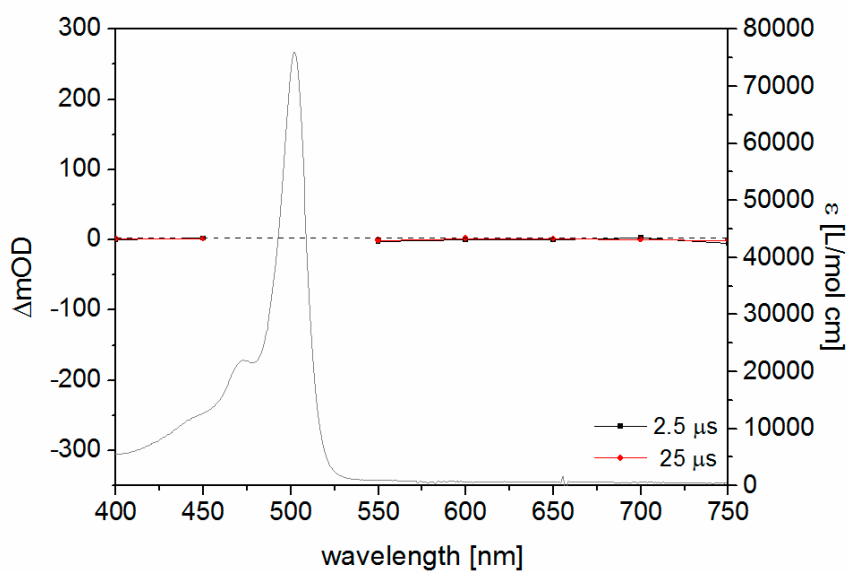

**Figure S13.** Transient absorption spectra at chosen delay times (black, red, green) upon excitation with the pump pulse centred at 500 nm and stationary absorption spectrum (grey) of **4** in THF.

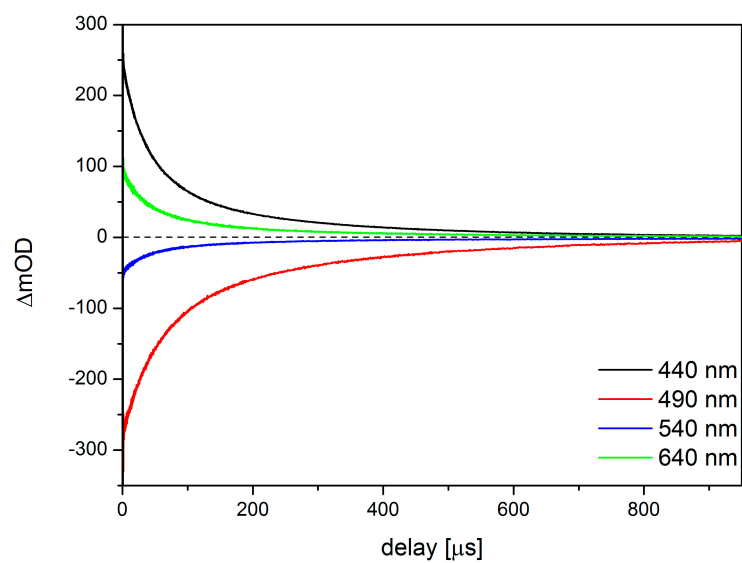

**Figure S14.** ns- transient absorption decay kinetics of the long-lived triplet state of **5** at chosen probe wavelengths.

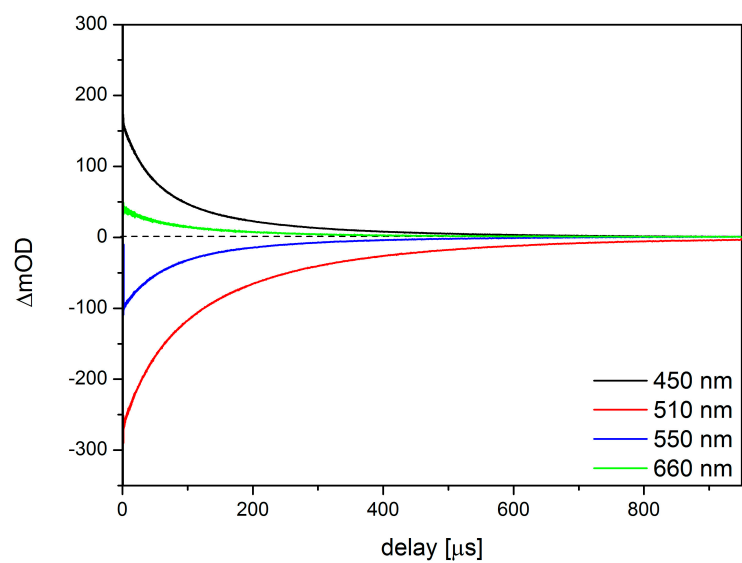

**Figure S15.** ns- transient absorption decay kinetics of the long-lived triplet state of **6** at chosen probe wavelengths.

## Quantum Chemical Evaluation

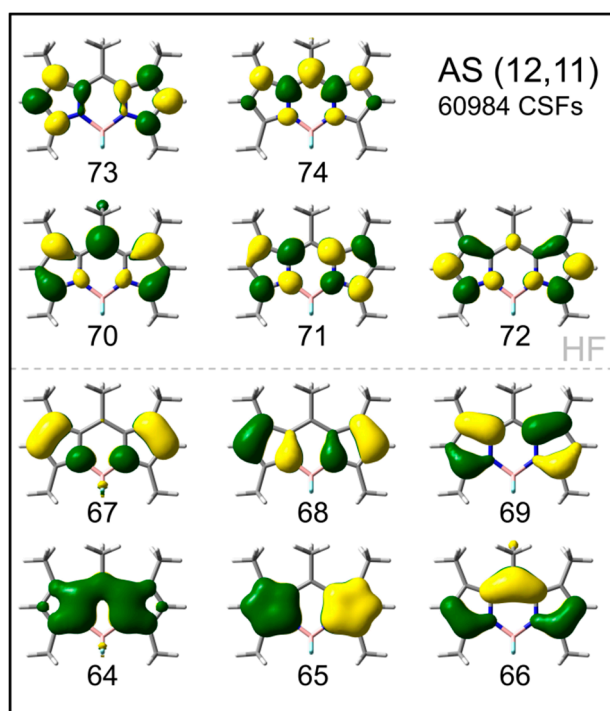

**Figure S16.** MOs of the AS (12,11), comprising the entire  $\pi\pi^*$  system of **2**, used in the MS-CASPT2//CASSCF reference calculations. Grey line indicates to the occupation of the MOs within the Hartree-Fock wavefunction.

**Table S2.** Leading transitions, excitation energies (in eV), wavelengths (in nm), and oscillator strengths obtained by MS-CASPT2 (gas phase) and by TDDFT using the PBE0 functional for the low-lying singlet and triplet states of **2**. TDDFT values are given in gas phase and in THF (in parentheses).

| MS-CASPT2      |            |        |               |                   |       | TD-PBE0    |               |               |                   |         |
|----------------|------------|--------|---------------|-------------------|-------|------------|---------------|---------------|-------------------|---------|
|                | Transition | weight | $E^e$ /<br>eV | $\lambda$ /<br>nm | $f$   | Transition | weight /<br>% | $E^e$ /<br>eV | $\lambda$ /<br>nm | $f$     |
| S <sub>0</sub> | HF         | 83     | -             | -                 | -     | -          | -             | -             | -                 | -       |
| S <sub>1</sub> | 69 → 70    | 57     | 2.72          | 456               | 0.672 | 69 → 70    | 95 (99)       | 3.06          | 405               | 0.523   |
|                | 68 → 70    | 15     |               |                   |       |            |               | (2.96)        | (419)             | (0.641) |
| S <sub>2</sub> | 68 → 70    | 52     | 3.76          | 330               | 0.071 | 68 → 70    | 96 (98)       | 3.65          | 340               | 0.062   |
|                | 69 → 70    | 13     |               |                   |       |            |               | (3.67)        | (338)             | (0.058) |
|                | DE         | 12     |               |                   |       |            |               |               |                   |         |
| S <sub>3</sub> | 67 → 70    | 58     | 3.93          | 315               | 0.042 | 67 → 70    | 99 (99)       | 3.88          | 320               | 0.030   |
|                | DE         | 15     |               |                   |       |            |               | (3.92)        | (316)             | (0.046) |
| S <sub>4</sub> | DE         | 37     | 4.46          | 288               | 0.042 | 66 → 70    | 91 (93)       | 4.94          | 251               | 0.138   |
|                | 66 → 70    | 26     |               |                   |       |            |               | (4.90)        | (253)             | (0.194) |
|                | 69 → 74    | 8      |               |                   |       |            |               |               |                   |         |
| T <sub>1</sub> | 69 → 70    | 82     | 1.99          | 623               | -     | 69 → 70    | 98 (98)       | 1.55          | 800               | -       |
|                |            |        |               |                   |       |            |               | (1.59)        | (782)             |         |
| T <sub>2</sub> | 68 → 70    | 72     | 3.23          | 384               | 0.004 | 68 → 70    | 95 (95)       | 2.86          | 434               | -       |
|                |            |        |               |                   |       |            |               | (2.91)        | (426)             |         |
| T <sub>3</sub> | 67 → 70    | 67     | 3.40          | 365               | 0.005 | 67 → 70    | 86 (83)       | 2.98          | 416               | -       |
|                |            |        |               |                   |       | 66 → 70    | 8 (11)        | (3.04)        | (408)             |         |
| T <sub>4</sub> | 66 → 70    | 69     | 3.92          | 316               | 0.176 | 66 → 70    | 88 (85)       | 3.44          | 361               | -       |
|                | 67 → 70    | 5      |               |                   |       | 67 → 70    | 8 (12)        | (3.45)        | (359)             |         |

**Table S3.** MOs involved in leading transitions of low-lying bright excited singlet state (S<sub>1</sub>) and low-lying triplet states (T<sub>1</sub>-T<sub>3</sub>) within the fully optimized singlet ground state equilibrium structure of **2**.

**2** (optimized S<sub>0</sub> geometry)

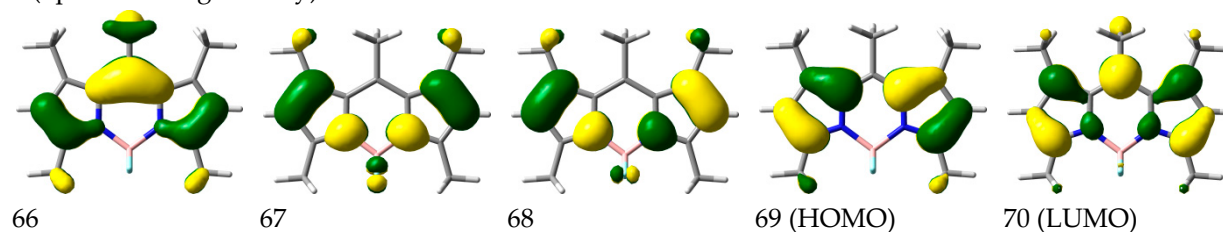

**Table S4.** Excited and ground state energies of S<sub>0</sub>, S<sub>1</sub>, T<sub>1</sub>, T<sub>2</sub>, and T<sub>3</sub> within optimized equilibrium geometries of S<sub>0</sub>, S<sub>1</sub> and T<sub>1</sub> for dyes of 4–8. All numbers are given relative to the ground state energy (S<sub>0</sub>) in the optimized S<sub>0</sub> structure.

|                                 |                | Equilibrium Geometry |                |                |                |                |                |                |                |                |                |                |                |                |                |                |
|---------------------------------|----------------|----------------------|----------------|----------------|----------------|----------------|----------------|----------------|----------------|----------------|----------------|----------------|----------------|----------------|----------------|----------------|
|                                 |                | 4                    |                |                | 5              |                |                | 6              |                |                | 7              |                |                | 8              |                |                |
| $E^s(\text{state}) / \text{eV}$ | S <sub>0</sub> | S <sub>0</sub>       | S <sub>1</sub> | T <sub>1</sub> | S <sub>0</sub> | S <sub>0</sub> | S <sub>1</sub> | T <sub>1</sub> | S <sub>0</sub> | S <sub>0</sub> | S <sub>1</sub> | T <sub>1</sub> | S <sub>0</sub> | S <sub>0</sub> | S <sub>1</sub> | T <sub>1</sub> |
|                                 | S <sub>1</sub> | 0.00                 | 0.04           | 0.13           | 0.00           | 0.04           | 0.12           | 0.00           | 0.05           | 0.09           | 0.00           | 0.04           | 0.11           | 0.00           | 0.04           | 0.10           |
|                                 | T <sub>1</sub> | 2.91                 | 2.71           | 2.91           | 2.81           | 2.63           | 2.84           | 2.75           | 2.59           | 2.80           | 2.80           | 2.62           | 2.81           | 2.69           | 2.52           | 2.72           |
|                                 | T <sub>2</sub> | 1.49                 | 1.41           | 1.53           | 1.48           | 1.45           | 1.53           | 1.54           | 1.56           | 1.59           | 1.46           | 1.41           | 1.51           | 1.43           | 1.40           | 1.48           |
|                                 | T <sub>3</sub> | 2.83                 | 2.88           | 3.13           | 2.68           | 2.66           | 2.94           | 2.61           | 2.57           | 2.83           | 2.68           | 2.69           | 2.97           | 2.63           | 2.63           | 2.91           |
|                                 | T <sub>3</sub> | 3.00                 | 2.99           | 3.15           | 2.92           | 2.94           | 3.10           | 2.79           | 2.73           | 3.38           | 2.99           | 3.00           | 3.15           | 2.87           | 2.88           | 3.09           |

**Table S5.** MOs involved in leading transitions of bright excited singlet states (and low-lying triplet states ( $T_1$ - $T_3$ )) of 4–8 within the  $S_0$  equilibrium structure and bright triplet excited states (triplet-to-triplet) within the  $T_1$  equilibrium structure.

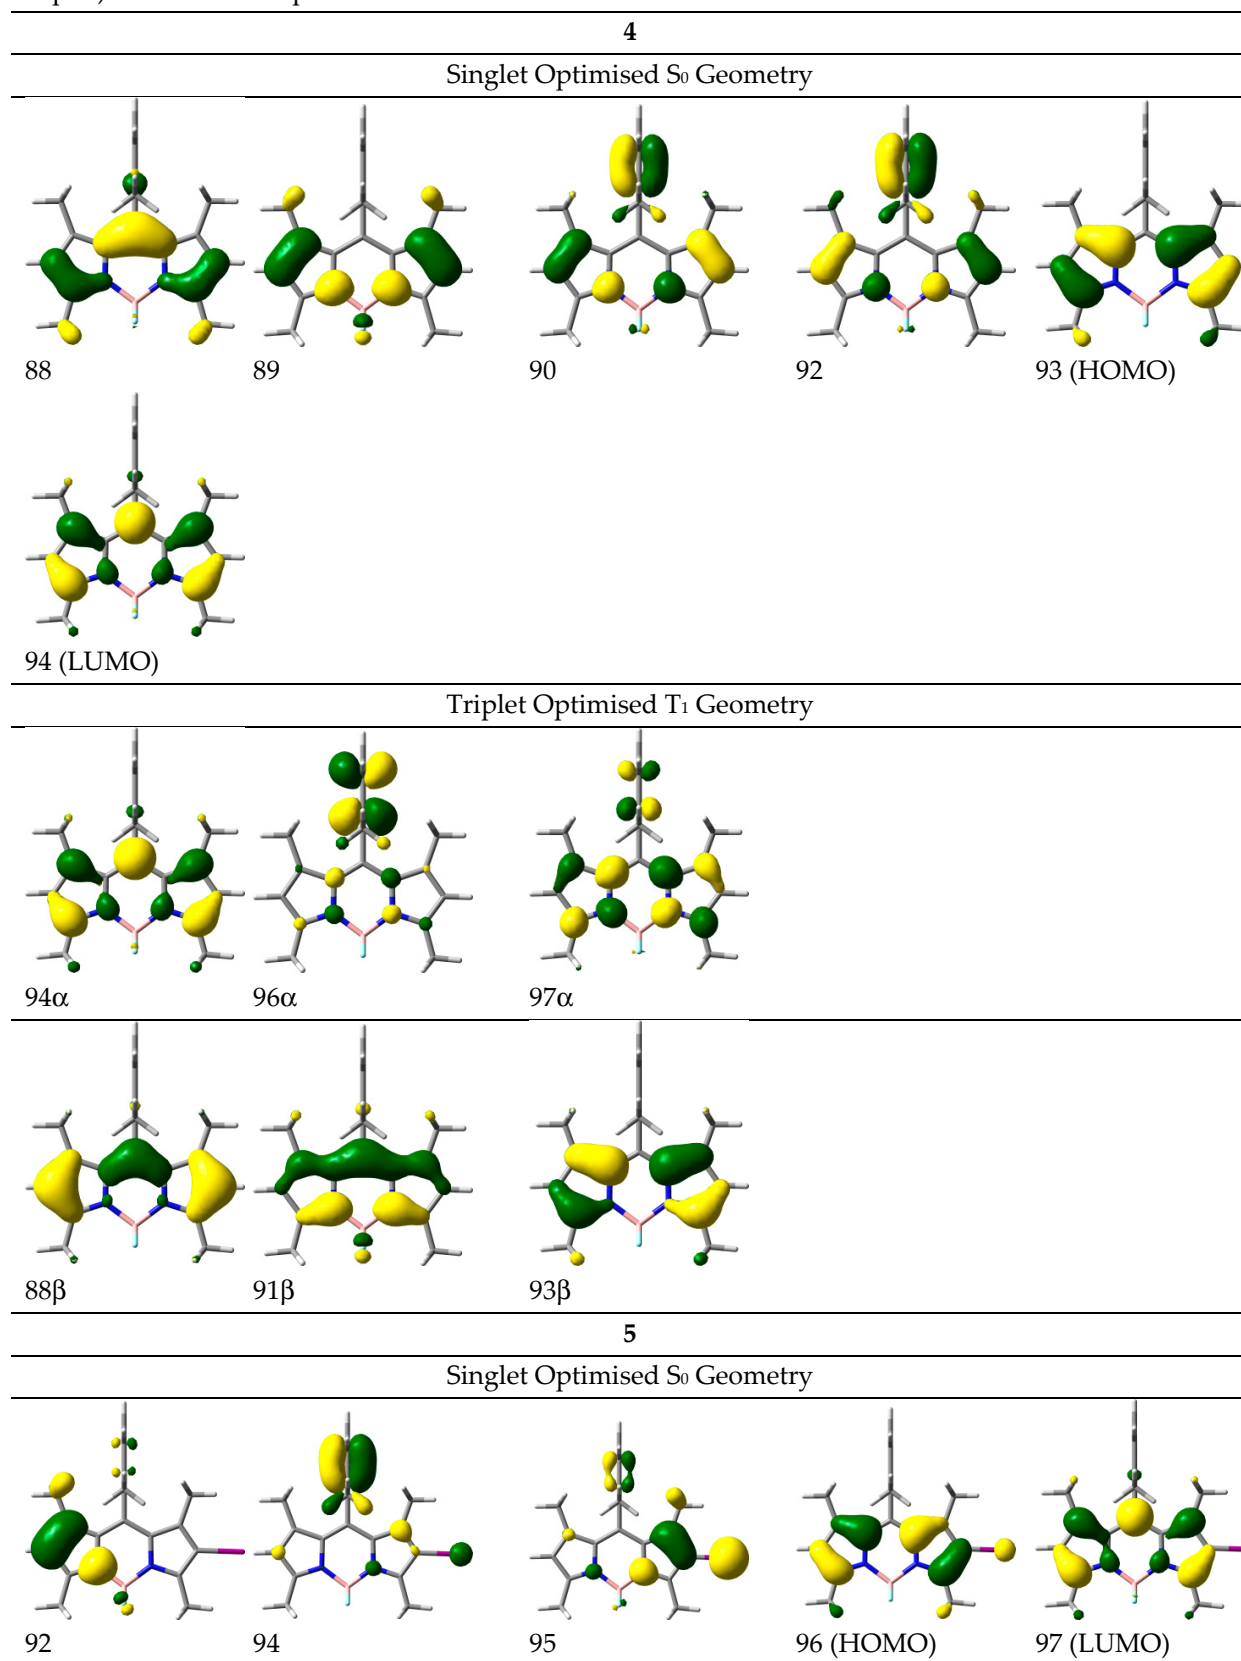

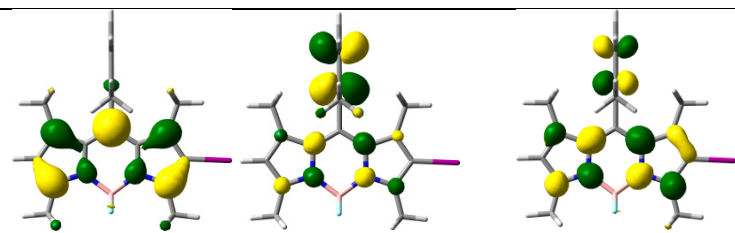Triplet Optimised T<sub>1</sub> Geometry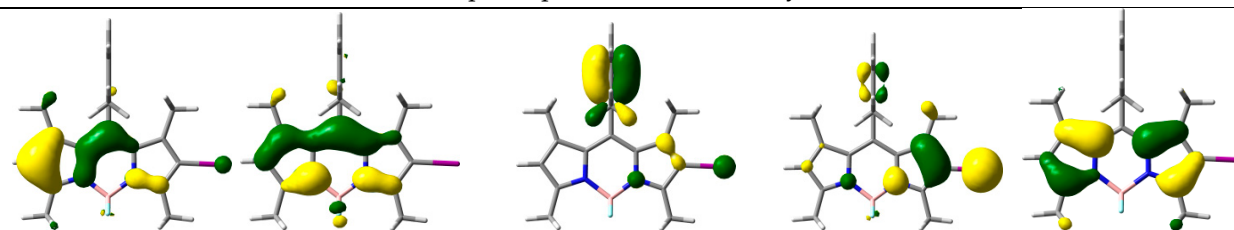

6

Singlet Optimised S<sub>0</sub> Geometry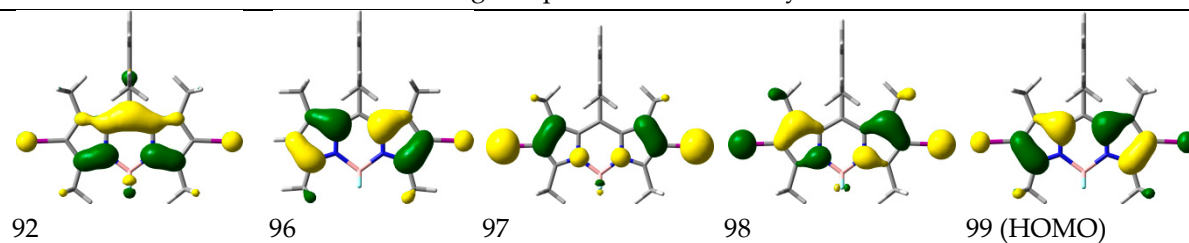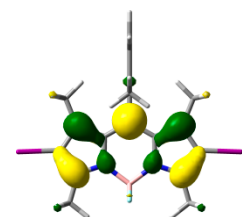Triplet Optimised T<sub>1</sub> Geometry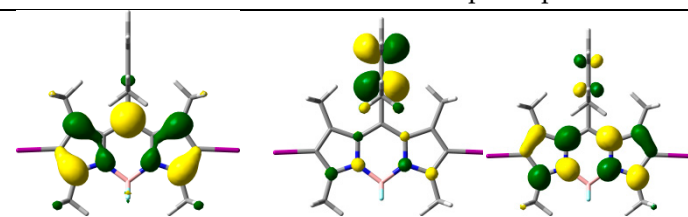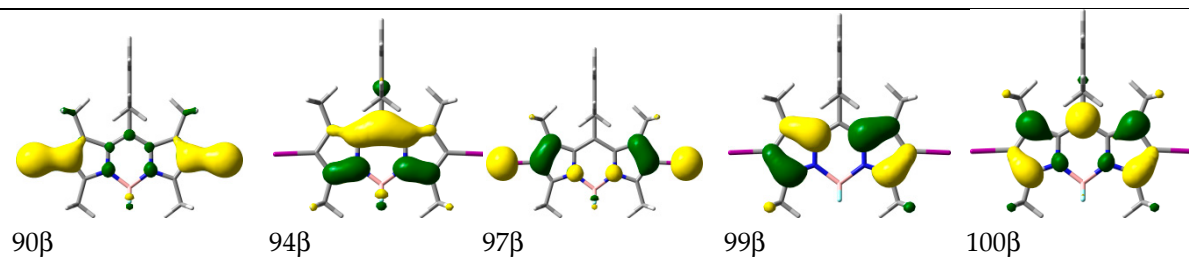

7

Singlet Optimised  $S_0$  Geometry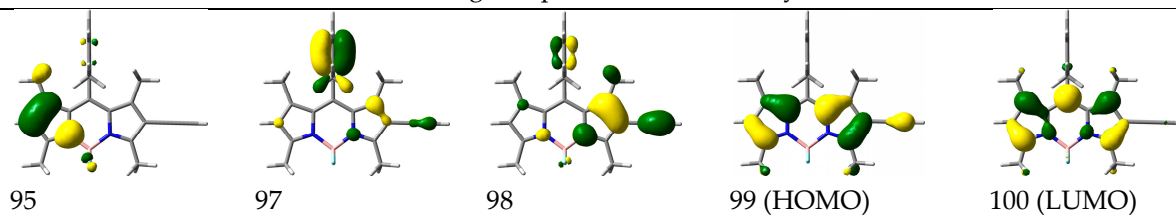Triplet Optimised  $T_1$  Geometry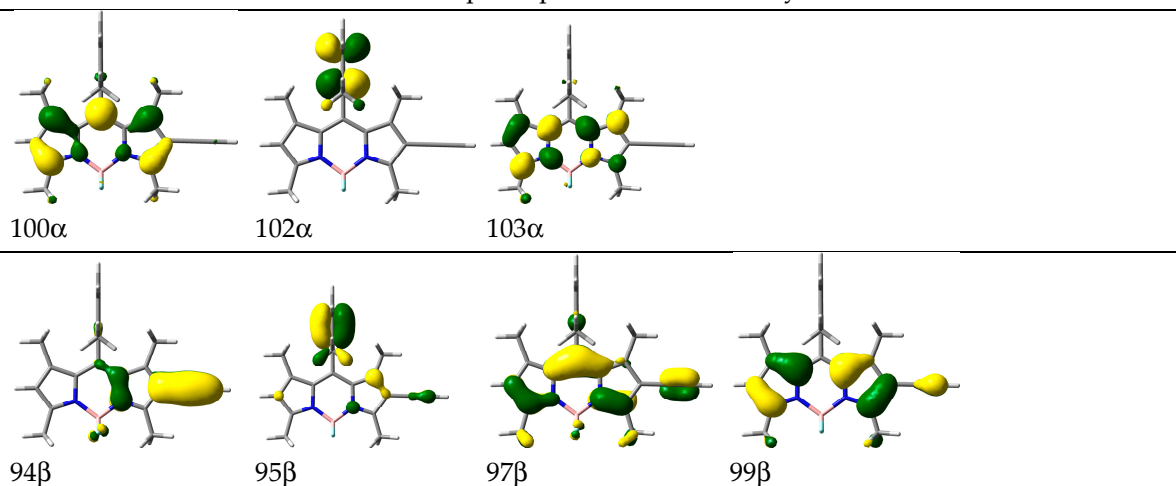

8

Singlet Optimised  $S_0$  Geometry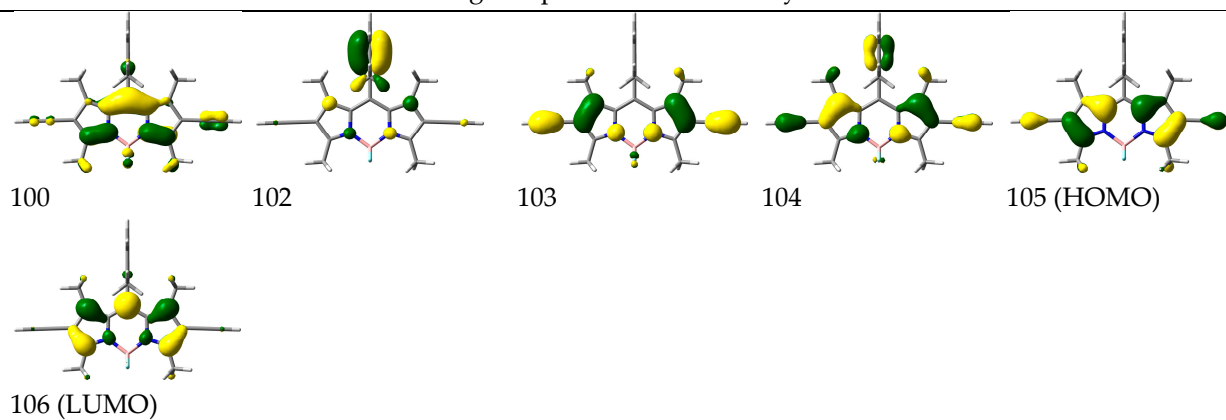Triplet Optimised  $T_1$  Geometry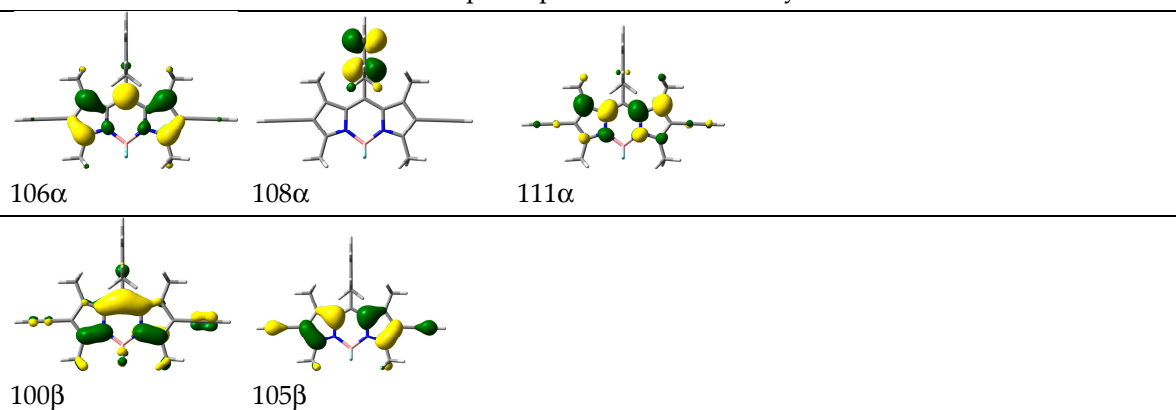

**Table S6:** Leading transitions, excitation energies (in eV), wavelengths (in nm), oscillator strengths and  $\langle s^2 \rangle$  expectation value (spin-contamination) of bright UV-VIS excitations (singlet and triplet)



obtained at the TDDFT level of theory in THF for dyes 4–8. Singlet-to-singlet and triplet-to-triplet excitations were obtained within the respective equilibrium structure.

| 4                                                          |               |            |                     |        |       |                   |
|------------------------------------------------------------|---------------|------------|---------------------|--------|-------|-------------------|
| Singlet Excited States (Optimised S <sub>0</sub> Geometry) |               |            |                     |        |       |                   |
| state                                                      | transition    | weight / % | E <sup>e</sup> / eV | λ / nm | f     | ⟨s <sup>2</sup> ⟩ |
| S <sub>1</sub>                                             | 93 → 94 LE    | 99         | 2.91                | 427    | 0.591 | -                 |
| S <sub>4</sub>                                             | 90 → 94 CT    | 95         | 3.76                | 330    | 0.046 | -                 |
| S <sub>5</sub>                                             | 89 → 94 LE    | 99         | 3.85                | 322    | 0.043 | -                 |
| Triplet Excited States (Optimised T <sub>1</sub> Geometry) |               |            |                     |        |       |                   |
| state                                                      | transition    | weight / % | E <sup>e</sup> / eV | λ / nm | f     | ⟨s <sup>2</sup> ⟩ |
| T <sub>2</sub>                                             | 91β → 93β LE  | 93         | 1.60                | 774    | 0.036 | 2.05              |
| T <sub>5</sub>                                             | 88β → 93β LE  | 90         | 2.22                | 560    | 0.067 | 2.04              |
| T <sub>8</sub>                                             | 94α → 96α CT  | 84         | 3.27                | 380    | 0.195 | 2.05              |
|                                                            | 94α → 97α LE  | 10         |                     |        |       |                   |
| T <sub>10</sub>                                            | 94α → 97α LE  | 83         | 3.54                | 351    | 0.168 | 2.06              |
|                                                            | 94α → 96α CT  | 13         |                     |        |       |                   |
| 5                                                          |               |            |                     |        |       |                   |
| Singlet Excited States (Optimised S <sub>0</sub> Geometry) |               |            |                     |        |       |                   |
| state                                                      | transition    | weight / % | E <sup>e</sup> / eV | λ / nm | F     | ⟨s <sup>2</sup> ⟩ |
| S <sub>1</sub>                                             | 96 → 97 LE    | 97         | 2.81                | 441    | 0.616 | -                 |
| S <sub>2</sub>                                             | 95 → 97 LE    | 93         | 3.33                | 373    | 0.055 | -                 |
| S <sub>4</sub>                                             | 94 → 97 CT    | 95         | 3.60                | 344    | 0.067 | -                 |
| S <sub>5</sub>                                             | 92 → 97 LE    | 98         | 3.73                | 332    | 0.049 | -                 |
| Triplet Excited States (Optimised T <sub>1</sub> Geometry) |               |            |                     |        |       |                   |
| state                                                      | transition    | weight / % | E <sup>e</sup> / eV | λ / nm | f     | ⟨s <sup>2</sup> ⟩ |
| T <sub>3</sub>                                             | 92β → 96β LE  | 85         | 1.58                | 786    | 0.026 | 2.05              |
| T <sub>5</sub>                                             | 94β → 96β CT  | 55         | 1.99                | 622    | 0.068 | 2.04              |
|                                                            | 91β → 96β LE  | 31         |                     |        |       |                   |
|                                                            | 92β → 96β LE  | 10         |                     |        |       |                   |
| T <sub>6</sub>                                             | 91β → 96β LE  | 55         | 2.05                | 605    | 0.050 | 2.04              |
|                                                            | 94β → 96β CT  | 34         |                     |        |       |                   |
|                                                            | 95β → 96β LE  | 8          |                     |        |       |                   |
| T <sub>10</sub>                                            | 97α → 100α CT | 78         | 3.28                | 378    | 0.284 | 2.05              |
|                                                            | 97α → 101α LE | 14         |                     |        |       |                   |

| 6                                                          |                |            |                     |        |       |                   |
|------------------------------------------------------------|----------------|------------|---------------------|--------|-------|-------------------|
| Singlet Excited States (Optimised S <sub>0</sub> Geometry) |                |            |                     |        |       |                   |
| state                                                      | transition     | weight / % | E <sup>e</sup> / eV | λ / nm | f     | ⟨s <sup>2</sup> ⟩ |
| S <sub>1</sub>                                             | 99 → 100 LE    | 96         | 2.75                | 450    | 0.692 | -                 |
| S <sub>2</sub>                                             | 98 → 100 LE    | 93         | 3.39                | 366    | 0.192 | -                 |
| S <sub>4</sub>                                             | 97 → 100 LE    | 98         | 3.44                | 360    | 0.062 | -                 |
| S <sub>5</sub>                                             | 96 → 100 LE    | 97         | 3.53                | 351    | 0.036 | -                 |
| Triplet Excited States (Optimised T <sub>1</sub> Geometry) |                |            |                     |        |       |                   |
| state                                                      | transition     | weight / % | E <sup>e</sup> / eV | λ / nm | f     | ⟨s <sup>2</sup> ⟩ |
| T <sub>3</sub>                                             | 97β → 99β LE   | 85         | 1.42                | 873    | 0.015 | 2.039             |
|                                                            | 94β → 99β LE   | 10         |                     |        |       |                   |
| T <sub>5</sub>                                             | 94β → 99β LE   | 84         | 1.80                | 691    | 0.217 | 2.038             |
|                                                            | 97β → 99β LE   | 10         |                     |        |       |                   |
| T <sub>13</sub>                                            | 100α → 104α CT | 51         | 3.35                | 370    | 0.289 | 2.035             |
|                                                            | 100α → 105α LE | 30         |                     |        |       |                   |
|                                                            | 90β → 99β LE   | 12         |                     |        |       |                   |
| T <sub>14</sub>                                            | 90β → 99β LE   | 67         | 3.44                | 361    | 0.025 | 2.064             |
|                                                            | 98β → 100β LE  | 12         |                     |        |       |                   |
|                                                            | 100α → 104α CT | 9          |                     |        |       |                   |
| T <sub>16</sub>                                            | 100α → 105α LE | 58         | 3.54                | 350    | 0.116 | 2.044             |
|                                                            | 100α → 104α CT | 38         |                     |        |       |                   |
| 7                                                          |                |            |                     |        |       |                   |
| Singlet Excited States (Optimised S <sub>0</sub> Geometry) |                |            |                     |        |       |                   |
| state                                                      | transition     | weight / % | E <sup>e</sup> / eV | λ / nm | f     | ⟨s <sup>2</sup> ⟩ |
| S <sub>1</sub>                                             | 99 → 100 LE    | 97         | 2.80                | 443    | 0.640 | -                 |
| S <sub>2</sub>                                             | 98 → 100 LE    | 92         | 3.33                | 372    | 0.058 | -                 |
| S <sub>4</sub>                                             | 97 → 100 CT    | 94         | 3.61                | 344    | 0.075 | -                 |
| S <sub>5</sub>                                             | 95 → 100 LE    | 98         | 3.74                | 332    | 0.049 | -                 |
| Triplet Excited States (Optimised T <sub>1</sub> Geometry) |                |            |                     |        |       |                   |
| state                                                      | transition     | weight / % | E <sup>e</sup> / eV | λ / nm | f     | ⟨s <sup>2</sup> ⟩ |
| T <sub>3</sub>                                             | 97β → 99β LE   | 75         | 1.64                | 755    | 0.034 | 2.05              |
|                                                            | 95β → 99β CT   | 15         |                     |        |       |                   |
| T <sub>5</sub>                                             | 94β → 99β LE   | 79         | 2.13                | 583    | 0.086 | 2.04              |
|                                                            | 95β → 99β CT   | 12         |                     |        |       |                   |
| T <sub>8</sub>                                             | 100α → 102α CT | 86         | 3.23                | 384    | 0.192 | 2.05              |
|                                                            | 100α → 103α LE | 8          |                     |        |       |                   |
| T <sub>1</sub>                                             | 100α → 103α LE | 83         | 3.50                | 354    | 0.190 | 2.06              |
|                                                            | 100α → 102α CT | 11         |                     |        |       |                   |

## 8

| Singlet Excited States (Optimised S <sub>0</sub> Geometry) |                |            |                     |        |       |                   |
|------------------------------------------------------------|----------------|------------|---------------------|--------|-------|-------------------|
| state                                                      | transition     | weight / % | E <sup>e</sup> / eV | λ / nm | f     | ⟨s <sup>2</sup> ⟩ |
| S <sub>1</sub>                                             | 105 → 106 LE   | 96         | 2.69                | 461    | 0.713 | -                 |
| S <sub>2</sub>                                             | 104 → 106 LE   | 94         | 3.24                | 383    | 0.071 | -                 |
| S <sub>4</sub>                                             | 103 → 106 LE   | 97         | 3.40                | 365    | 0.071 | -                 |
| S <sub>5</sub>                                             | 102 → 106 CT   | 95         | 3.53                | 351    | 0.109 | -                 |
| Triplet Excited States (Optimised T <sub>1</sub> Geometry) |                |            |                     |        |       |                   |
| state                                                      | transition     | weight / % | E <sup>e</sup> / eV | λ / nm | f     | ⟨s <sup>2</sup> ⟩ |
| T <sub>4</sub>                                             | 100β → 105β LE | 91         | 2.00                | 619    | 0.138 | 2.04              |
| T <sub>8</sub>                                             | 106α → 108α CT | 88         | 3.19                | 389    | 0.187 | 2.05              |
| T <sub>9</sub>                                             | 106α → 111α LE | 85         |                     |        |       |                   |
|                                                            | 106α → 108α CT | 10         | 3.47                | 358    | 0.221 | 2.05              |

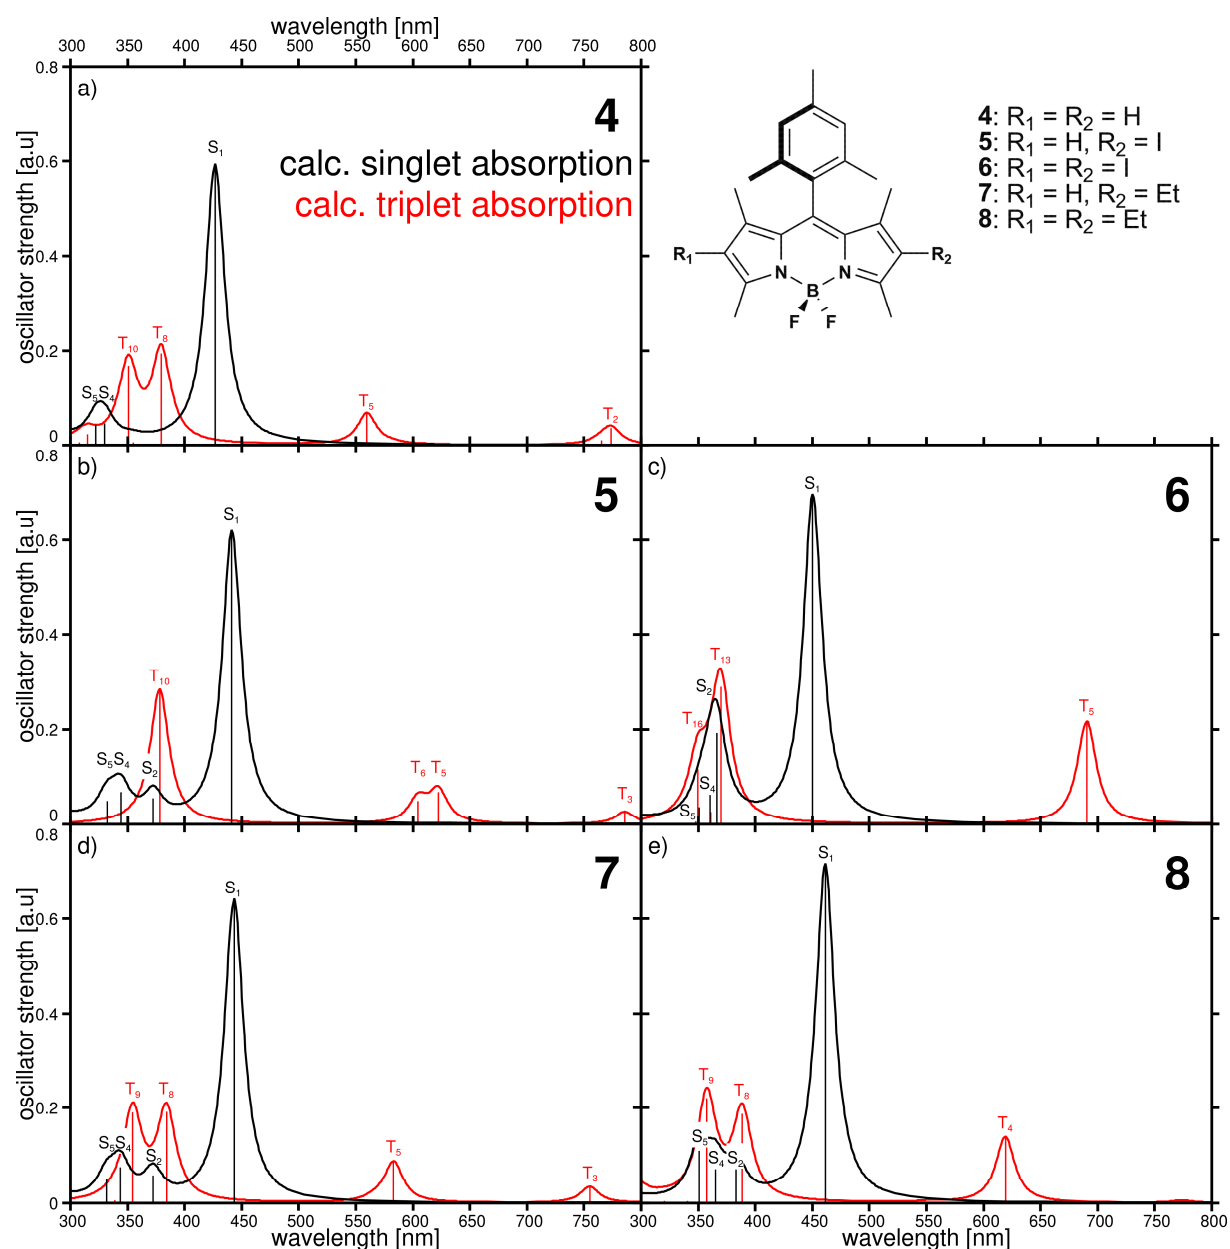

**Figure S17.** Calculated singlet (in black) and triplet (in red) absorption spectra (THF) of dyes 4–8 within optimised singlet and triplet ground state structures. Triplet absorption spectra are correlated to excited states absorption signals in the transient absorption spectra.

## Analysis of fs Transient Absorption Data

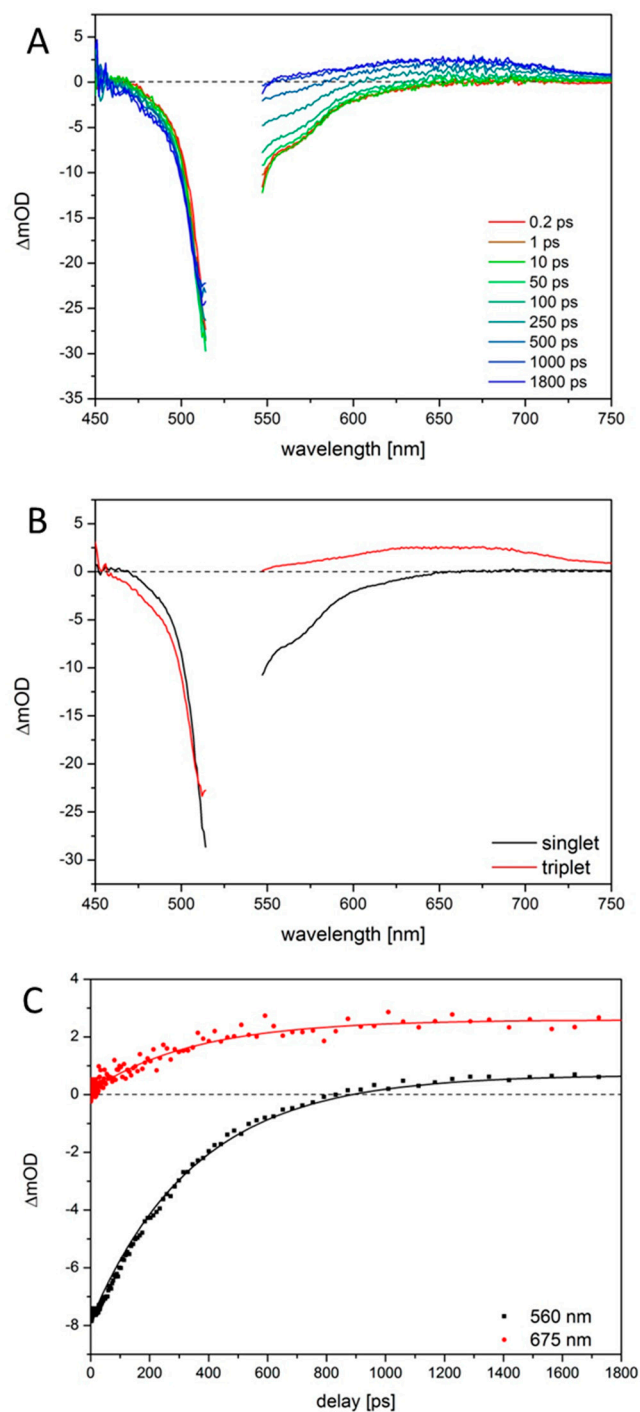

**Figure S18.** Formation of triplet state in 5: (A) transient spectra at selected delay times, (B) species spectra resulting from the global fit of the data, the spectrum of the initially populated species is assigned to the singlet state and contains mainly contributions of ground-state bleach and stimulated emission, the spectrum of the subsequently with a time constant of 354 ps populated species agrees well with the spectrum of the long-lived species in ns time-resolved measurements, which is assigned to the triplet state (C) kinetic traces at chosen probe wavelengths (line fits). The spectral region around the excitation wavelength (530 nm) was neglected in data evaluation due to a scattered pump.

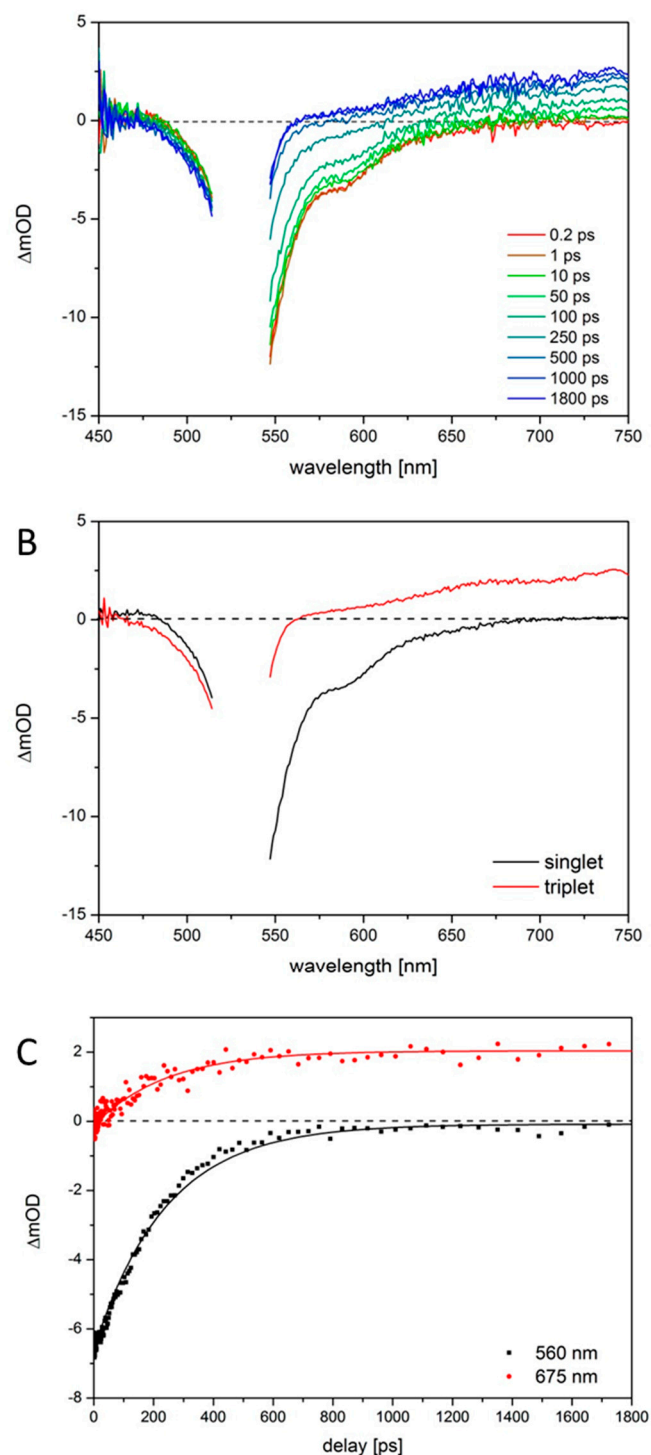

**Figure S19.** Formation of triplet state in 6: (A) transient spectra at selected delay times, (B) species spectra resulting from the global fit of the data, the spectrum of the initially populated species is assigned to the singlet state and contains mainly contributions of ground-state bleach and stimulated emission, the spectrum of the subsequently with a time constant of 240 ps populated species agrees well with the spectrum of the long-lived species in ns time-resolved measurements, which is assigned to the triplet state (C) kinetic traces at chosen probe wavelengths (line fits). The spectral region around the excitation wavelength (530 nm) was neglected in data evaluation due to a scattered pump.

## ESI-MS Data

**Table S1.** ESI MS data of BODIPY dyes before and after photolysis ( $\lambda > 420$  nm) of multicomponent catalyst systems with BODIPY dyes as PS, [Pd(PPh<sub>3</sub>)Cl<sub>2</sub>]<sub>2</sub> as WRC and TEA as SA in THF/H<sub>2</sub>O (11:3) at  $T = 25^\circ \text{C}$ .

| BODIPY dye | ESI MS of the pure dye                                                                                      | ESI MS after reaction                                                                 | Comment                |
|------------|-------------------------------------------------------------------------------------------------------------|---------------------------------------------------------------------------------------|------------------------|
| 1          | $m/z =$ no fragments could be assigned yet                                                                  | $m/z = 266.21$ (M-Cl+5H) <sup>+</sup>                                                 | Hydrogenated fragment  |
| 2          | $m/z = 285.13$ (M+Na) <sup>+</sup><br>263.15 (M+H) <sup>+</sup><br>243.15 (M-F) <sup>+</sup>                | $m/z = 215.16$ (M-BF <sub>2</sub> +2H) <sup>+</sup><br>235.14 (M-2F+11H) <sup>+</sup> | Hydrogenated fragments |
| 3          | $m/z = 512.93$ (M-H) <sup>-</sup>                                                                           | $m/z =$ no fragments could be assigned yet                                            |                        |
| 4          | $m/z = 319.22$ (M-BF <sub>2</sub> +H) <sup>+</sup>                                                          | $m/z = 319.22$ (M-BF <sub>2</sub> +H) <sup>+</sup>                                    |                        |
| 5          | $m/z = 515.09$ (M+Na) <sup>+</sup><br>493.11 (M+H) <sup>+</sup><br>473.10 (M-BF <sub>2</sub> ) <sup>+</sup> | $m/z = 319.22$ (M-I-BF <sub>2</sub> +H) <sup>+</sup>                                  | Iodine free fragment   |
| 6          | $m/z = 616.99$ (M-H) <sup>-</sup>                                                                           | $m/z = 319.22$ (M-2I-BF <sub>2</sub> +H) <sup>+</sup>                                 | Iodine free fragment   |
